# Supplementary material for: Simulation of the Ozone Monitoring Instrument aerosol index using the NASA Goddard Earth Observing System aerosol reanalysis products
Source: Copernicus journal article supplement (doi:10.5194/amt-10-4121-2017), 2017-11-03
Supplement: Supplementary file 1 [file amt-10-4121-2017-supplement.pdf]

Supplement of Atmos. Meas. Tech., 10, 4121–4134, 2017  
<https://doi.org/10.5194/amt-10-4121-2017-supplement>  
© Author(s) 2017. This work is distributed under  
the Creative Commons Attribution 3.0 License.

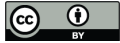

*Supplement of*

## **Simulation of the Ozone Monitoring Instrument aerosol index using the NASA Goddard Earth Observing System aerosol reanalysis products**

**Peter R. Colarco et al.**

*Correspondence to:* Peter R. Colarco ([peter.r.colarco@nasa.gov](mailto:peter.r.colarco@nasa.gov))

The copyright of individual parts of the supplement might differ from the CC BY 3.0 License.

a) MERRAero Aerosol Index (20070605)

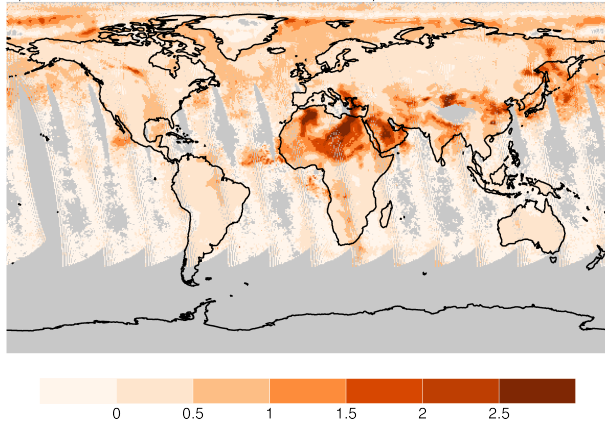

b) Surface Pressure Difference [hPa]: OMAERUV - MERRAero

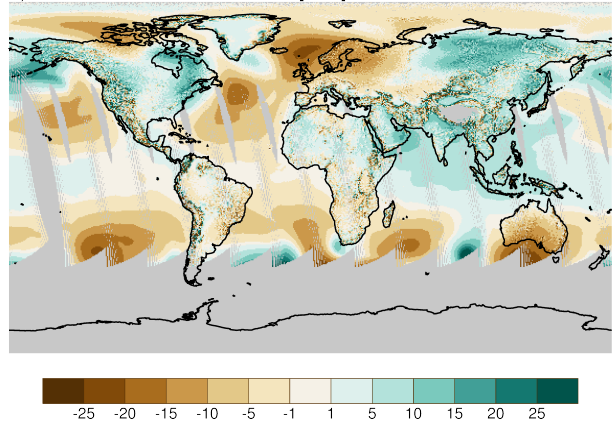

c) AI Difference: OMAERUV (own pressure) - MERRAero

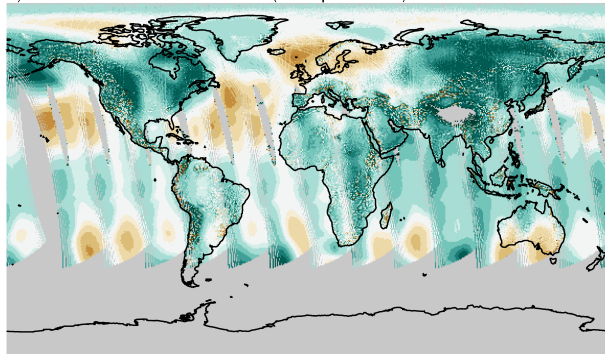

d) AI Difference: OMAERUV (MERRAero pressure) - MERRAero

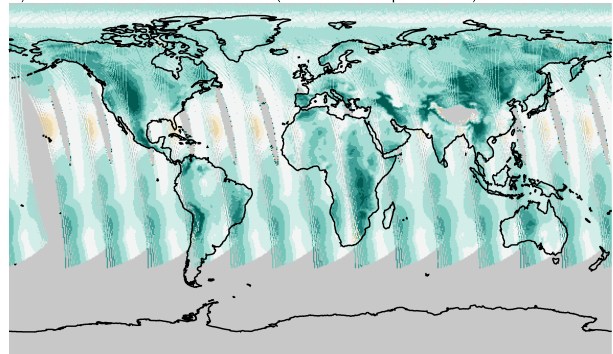

**Figure S1: As in Figure 1, for June 5, 2007, but including all surface pressures.**

a) AI Difference: OMAERUV (own pressure) - MERRAero June 2007

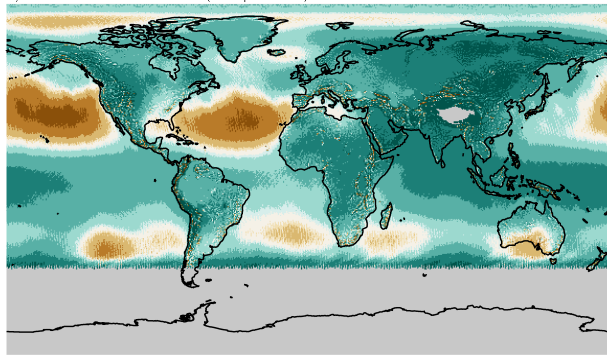

b) AI Difference: OMAERUV (MERRAero pressure) - MERRAero June 2007

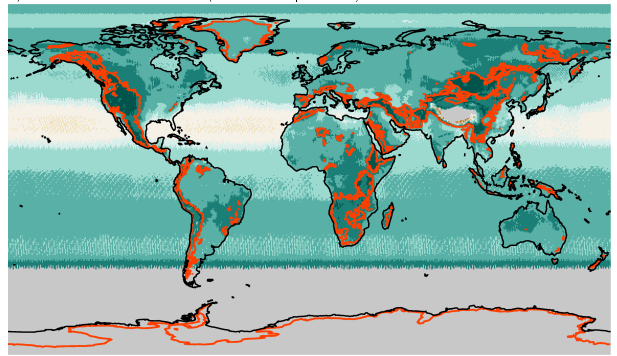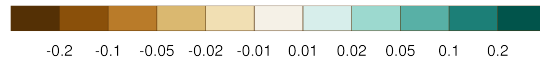

Figure S2: As in Figure 3 for June 2007, but including all surface pressures.

a) AI Difference: OMAERUV (MERRAero pressure) - MERRAero July 2007

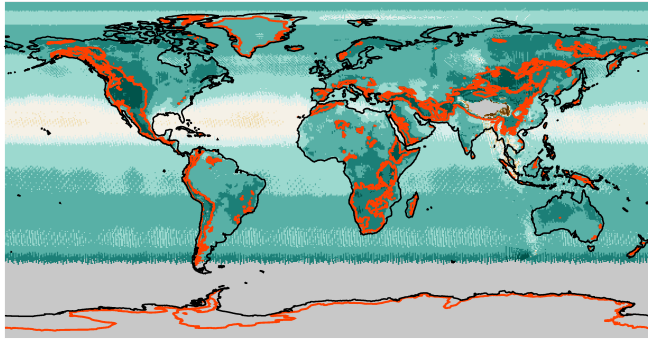

b) AI Difference: OMAERUV (MERRAero pressure) - MERRAero August 2007

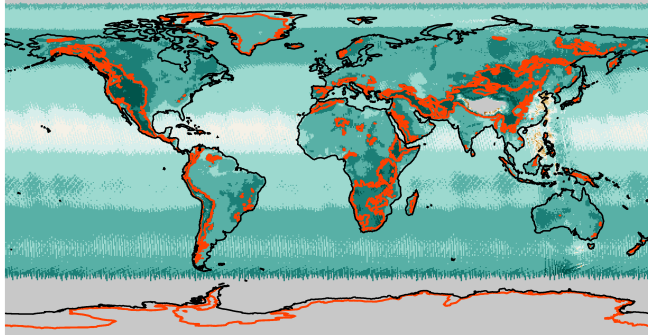

c) AI Difference: OMAERUV (MERRAero pressure) - MERRAero September 2007

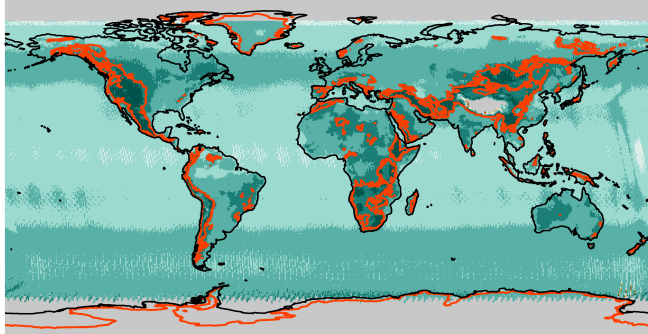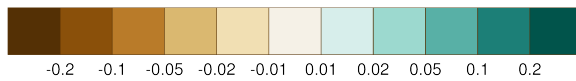

**Figure S3: As in Figure 4, but including all surface pressures.**
